# Supplementary material for: Additivity rule holds in the hydrogen transfer reactivity of unsaturated fatty acids with a peroxyl radical: mechanistic insight into lipoxygenase
Source: Royal Society of Chemistry journal article supplement (doi:10.1039/b515004c), 2006-01-01
Supplement: b515004c.pdf [file b515004c.pdf]

## **Electronic supplementary information**

### **Additivity rule holds in hydrogen-transfer reactivity of unsaturated fatty acids with a peroxy radical: mechanistic insight into lipoxygenase**

Hironori Kitaguchi, Kei Ohkubo, Seiji Ogo and Shunichi Fukuzumi\*

*Department of Material and Life Science, Graduate School of Engineering, Osaka  
University, SORST, Japan Science and Technology Agency, Suita, Osaka 565-0871,  
Japan*

\*To whom correspondence should be addressed.

E-mail: fukuzumi@chem.eng.osaka-u.ac.jp

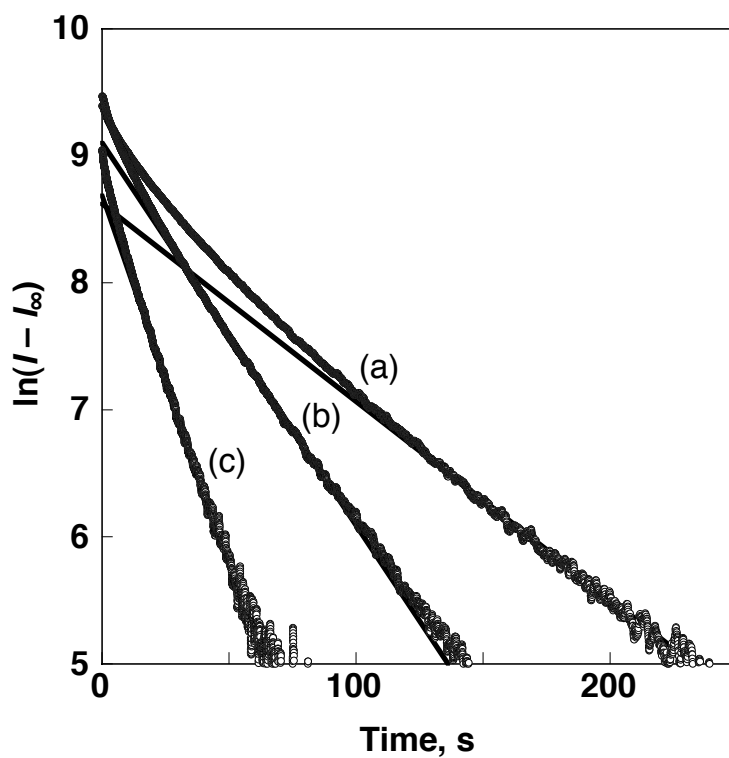

**Fig. S1** First-order plots for the decay of the ESR signal due to cumylperoxyl radical in the presence of various concentrations of arachidonic acid at 203 K; (a)  $0.01 \text{ mol dm}^{-3}$ , (b)  $0.02 \text{ mol dm}^{-3}$  and (c)  $0.04 \text{ mol dm}^{-3}$ . The pseudo-first-order rate constants were determined from the slopes of the linear correlations (the contribution of the bimolecular decay at the initial stage was excluded).

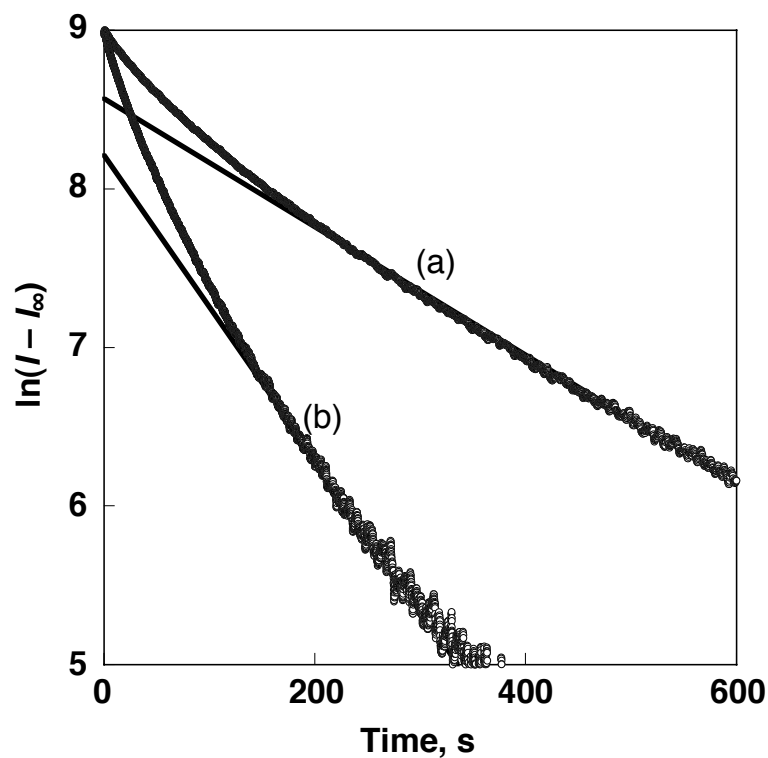

**Fig. S2** First-order plots for the decay of the ESR signal due to cumylperoxyl radical in the presence of various concentrations of linoleic acid at 203 K; (a)  $0.01 \text{ mol dm}^{-3}$  and (b)  $0.02 \text{ mol dm}^{-3}$ . The pseudo-first-order rate constants were determined from the slopes of the linear correlations (the contribution of the bimolecular decay at the initial stage was excluded).

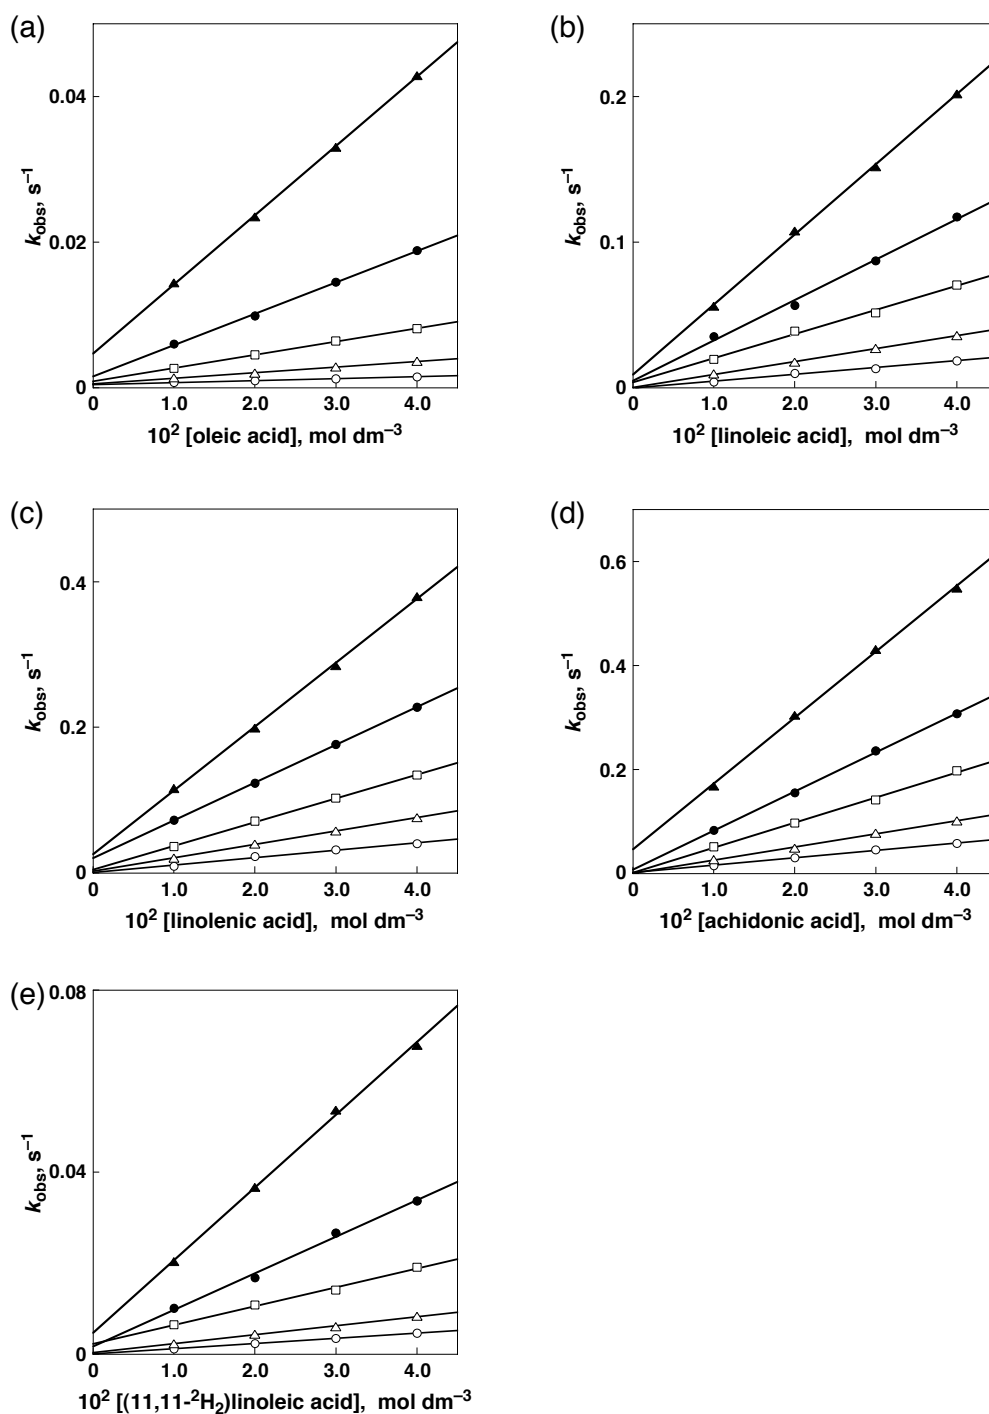

**Fig. S3** Plots of pseudo-first-order rate constants ( $k_{\text{obs}}$ ) vs. concentrations of unsaturated fatty acids for hydrogen transfer from unsaturated fatty acids to cumylperoxyl radical in  $\text{O}_2$ -saturated EtCN at 203 K (O), 213 K ( $\Delta$ ), 223 K ( $\square$ ), 233 K ( $\bullet$ ) and 243 K ( $\blacktriangle$ ).

**Table S1** Rate constants ( $k_{\text{H}}$  and  $k_{\text{D}}$ ) for hydrogen transfer from unsaturated fatty acids to cumylperoxyl radical in  $\text{O}_2$ -saturated EtCN.

| unsaturated fatty acid                | $k_{\text{H}}$ or $k_{\text{D}}$ , $\text{mol}^{-1} \text{dm}^3 \text{s}^{-1}$ |                                  |                                  |                                  |                                  |
|---------------------------------------|--------------------------------------------------------------------------------|----------------------------------|----------------------------------|----------------------------------|----------------------------------|
|                                       | 203 K                                                                          | 213 K                            | 223 K                            | 233 K                            | 243 K                            |
| oleic acid                            | $(2.65 \pm 0.04) \times 10^{-2}$                                               | $(7.63 \pm 0.24) \times 10^{-2}$ | $(1.82 \pm 0.03) \times 10^{-1}$ | $(4.31 \pm 0.11) \times 10^{-1}$ | $(9.50 \pm 0.11) \times 10^{-1}$ |
| linoleic acid                         | $(4.71 \pm 0.33) \times 10^{-1}$                                               | $(8.88 \pm 0.19) \times 10^{-1}$ | $1.66 \pm 0.10$                  | $2.78 \pm 0.16$                  | $4.81 \pm 0.10$                  |
| linolenic acid                        | $1.02 \pm 0.09$                                                                | $1.84 \pm 0.02$                  | $3.26 \pm 0.05$                  | $5.19 \pm 0.03$                  | $8.78 \pm 0.19$                  |
| arachidonic acid                      | $1.42 \pm 0.05$                                                                | $2.52 \pm 0.09$                  | $4.82 \pm 0.18$                  | $7.52 \pm 0.13$                  | $(1.27 \pm 0.00) \times 10$      |
| [11,11- $^2\text{H}_2$ ]linoleic acid | $(1.14 \pm 0.01) \times 10^{-1}$                                               | $(1.98 \pm 0.08) \times 10^{-1}$ | $(4.12 \pm 0.22) \times 10^{-1}$ | $(8.04 \pm 0.42) \times 10^{-1}$ | $1.60 \pm 0.04$                  |

**Table S2** Activation parameters for hydrogen transfer from unsaturated fatty acids to cumylperoxyl radical in O<sub>2</sub>-saturated EtCN

| unsaturated fatty acid                             | $\Delta H^\ddagger$ , kJ mol <sup>-1</sup> | $\Delta S^\ddagger$ , J K <sup>-1</sup> mol <sup>-1</sup> |
|----------------------------------------------------|--------------------------------------------|-----------------------------------------------------------|
| oleic acid                                         | 34.7 ± 0.3                                 | -101 ± 1                                                  |
| linoleic acid                                      | 21.9 ± 0.3                                 | -140 ± 1                                                  |
| linolenic acid                                     | 20.1 ± 0.3                                 | -143 ± 1                                                  |
| arachidonic acid                                   | 20.6 ± 0.5                                 | -137 ± 2                                                  |
| [11,11- <sup>2</sup> H <sub>2</sub> ]linoleic acid | 25.5 ± 1.3                                 | -135 ± 6                                                  |
